# Supplementary material for: Molecular Mechanisms of Disease Pathogenesis Differ in Krabbe Disease Variants
Source: PubMed Central journal article supplement (PMC4949656; doi:10.1111/tra.12404), 2016-05-30
Supplement: TRA-17-908-s002.pdf [file TRA-17-908-s002.pdf]

## SUPPORTING INFORMATION

Supplementary Table S1. Missense mutations of GALC described in the text

| Mutation | Alternate numbering * |
|----------|-----------------------|
| G41S     | G57S                  |
| R63H     | R79H                  |
| E215K    | E231K                 |
| G270D    | G286D                 |
| N279T    | N295T                 |
| P302R    | P318R                 |
| Y319C    | Y335C                 |
| R380W/L  | R396W/L               |
| T513M    | T529M                 |
| R515H    | R531H                 |
| I546T §  | I562T                 |
| Y551S    | Y567S                 |
| I583S    | I599S                 |
| L618S    | L634S                 |

\* The first start site in exon 1 is used for numbering in Uniprot entry P54803 and is has also been adopted by some publications. For clarity, these designations are also provided.

§ Polymorphism, also annotated as 1637T>C

**Table S2. Enzyme activity of WT GALC I546 and the T546 polymorphism**

| <b>Enzyme</b> | <b>K<sub>m</sub> (mM)</b> | <b>V<sub>max</sub> (nmol min<sup>-1</sup> μg<sup>-1</sup>)</b> | <b>k<sub>cat</sub> (s<sup>-1</sup>)</b> | <b>k<sub>cat</sub>/K<sub>m</sub> (s<sup>-1</sup> M<sup>-1</sup>)</b> |
|---------------|---------------------------|----------------------------------------------------------------|-----------------------------------------|----------------------------------------------------------------------|
| GALC – I546   | 3.3 ± 0.06                | 9.87 ± 0.2                                                     | 11.9                                    | 3,600                                                                |
| GALC – T546   | 3.6 ± 0.13                | 8.74 ± 0.3                                                     | 10.6                                    | 2,900                                                                |

**Table S3. Proportion of side chain buried in the structure, prediction and identified defect**

| <b>Mutation</b> | <b>% Buried ‡</b> | <b>Structure-based Prediction</b> | <b>Secreted</b> | <b>Localization</b> | <b>Defect</b>                         |
|-----------------|-------------------|-----------------------------------|-----------------|---------------------|---------------------------------------|
| G41S            | 100               | Misfolded                         | No              |                     | Misfolded                             |
| G270D           | 100               | Misfolded                         | I546 dependent  | I546 dependent      | Subtle misfolded                      |
| T513M           | 100               | Misfolded                         | No              | ER                  | Misfolded                             |
| I546T §         | 100               | Misfolded                         | No              | Lysosomal           | Subtle misfolded                      |
| I583S           | 100               | Misfolded                         | No              | ER                  | Misfolded                             |
| L618S           | 100               | Misfolded                         | No              | ER                  | Misfolded                             |
| N279T           | 99                | Misfolded                         | Yes             | ER                  | Hyper-glycosylated<br>Not endocytosed |
| Y319C           | 99                | Misfolded                         | No              | ER                  | Misfolded                             |
| P302R           | 92                | Misfolded                         | Yes             |                     | Not misfolded                         |
| R515H           | 82                | Uncertain                         | No              | ER                  | Misfolded                             |
| R63H            | 79                | Uncertain                         | No              |                     | Misfolded                             |
| Y551S           | 78                | Uncertain                         | No              | ER                  | Misfolded                             |
| E215K           | 57                | Not misfolded                     | Yes             | Lysosomal           | Not misfolded                         |
| R380W/L         | 48                | Not misfolded                     | Yes             | Lysosomal           | Not misfolded<br>Catalytic defect     |

‡ Using the mouse GALC structure (PDB 3ZR5) the proportion of each sidechain that is buried in the structure is reported as a percentage of that residue's entire surface area

§ Polymorphism, not disease-causing

Supplementary Figure S1

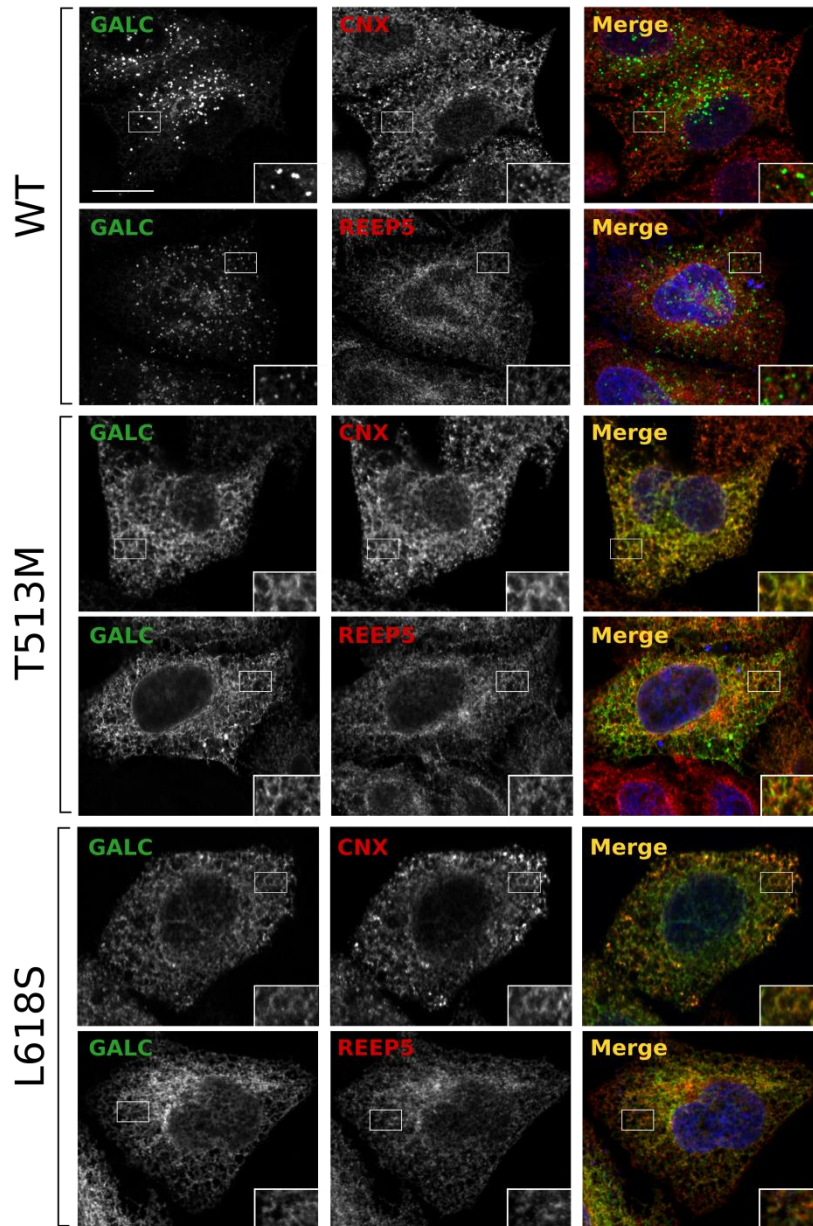

**Figure S1. Co-localization of T513M and L618S missense mutations with additional ER markers.** Representative confocal images of HeLa cells transfected with wild-type and Krabbe disease mutations T513M and L618S. Cells were plated onto glass coverslips, fixed and immunostained using monoclonal antibody against GALC (green) and the ER markers calnexin (CNX, red) or REEP5 (red). Nuclei were stained with DNA-binding dye, DAPI (blue). Scale bar 10  $\mu$ m.

Supplementary Figure S2

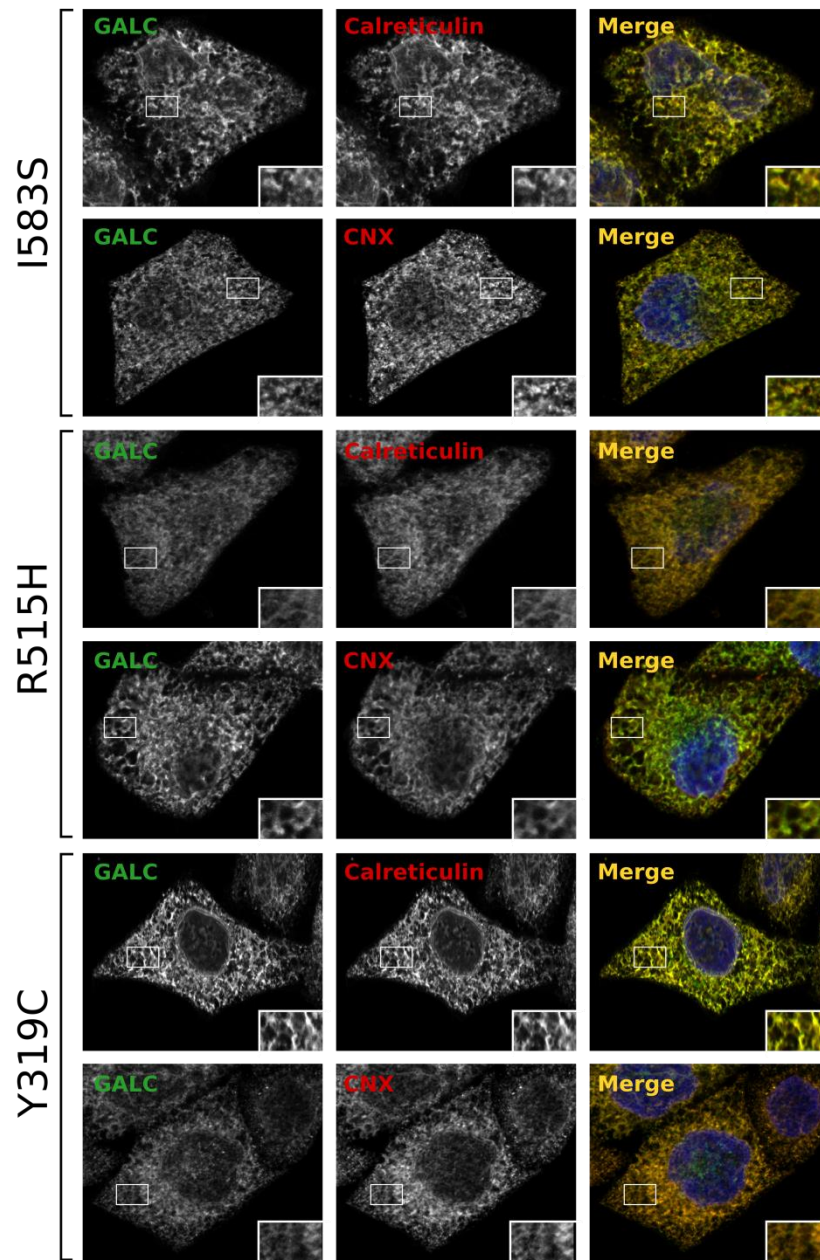

**Figure S2. Co-localization of additional missense mutations of GALC with ER markers.** Representative confocal images of HeLa cells transfected with wild-type and Krabbe disease mutations I583S, R515H and Y319C. Cells were plated onto glass coverslips, fixed and immunostained using monoclonal antibody against GALC (green) and the ER markers calreticulin (red) or calnexin (CNX, red). Nuclei were stained with DNA-binding dye, DAPI (blue). Scale bar 10  $\mu$ m.

Supplementary Figure S3

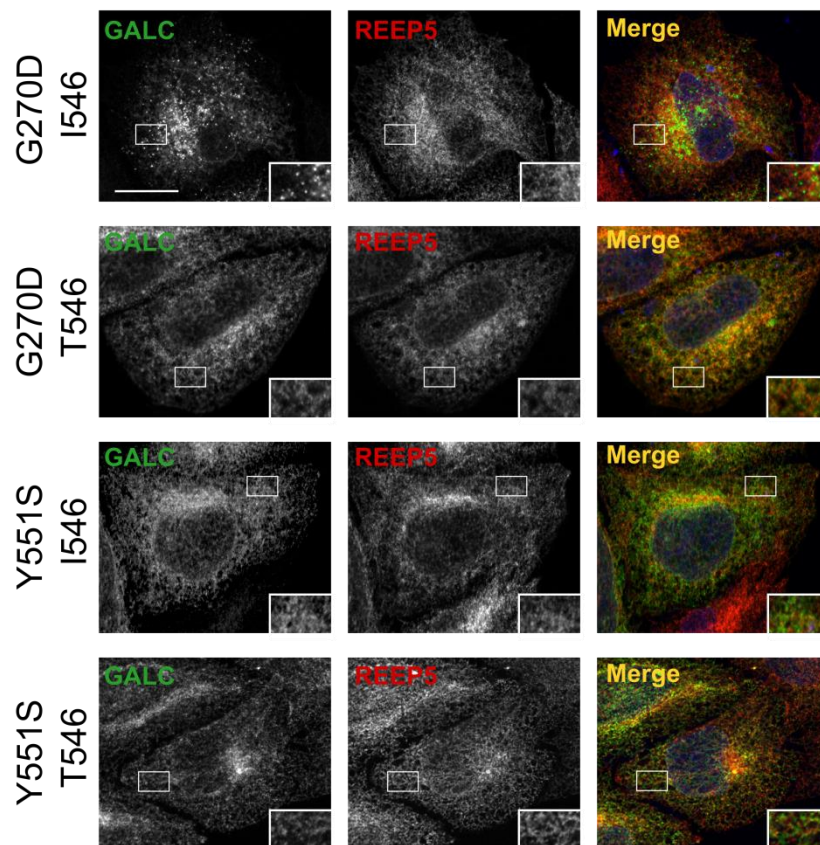

**Figure S3. Effect of polymorphic background on trafficking of G270D and Y551S.** Representative confocal images of HeLa cells transfected with Krabbe mutations G270D and Y551S in polymorphic backgrounds I546 and T546. Cells were plated onto glass coverslips, fixed and immunostained for GALC (green), the ER marker REEP5 (red). Nuclei were stained with DNA-binding dye, DAPI (blue). Scale bar 10  $\mu$ m.

Supplementary Figure S4

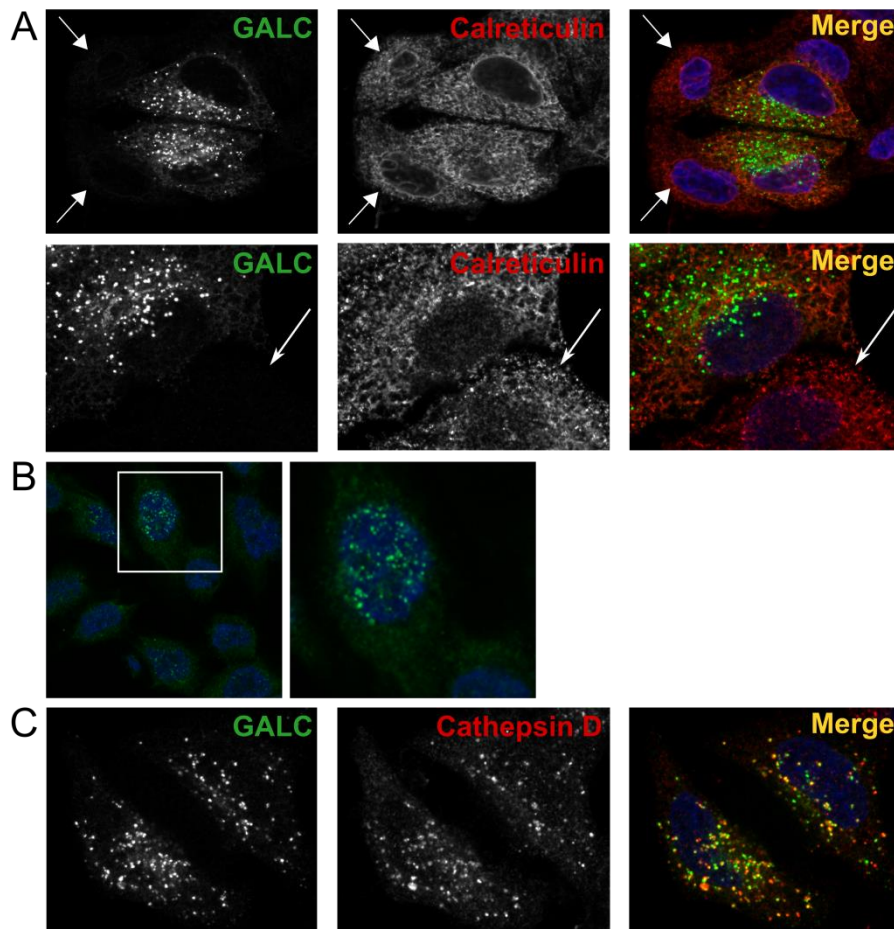

**Figure S4. Representative confocal images from untransfected HeLa cells and cells expressing N-terminally tagged GALC constructs.** A) Examples of confocal images containing transfected and untransfected cells illustrating undetectable endogenous GALC staining. Cells were plated onto glass coverslips, fixed and immunostained using monoclonal antibody against GALC (green) and the ER marker calreticulin (red). B) Representative confocal image of untransfected cells with data collected at high laser intensity to illustrate non-specific staining only. C) Representative confocal image of HeLa cells transfected with an N-terminally tagged construct of GALC to illustrate equivalent co-localization with the lysosomal marker cathepsin D (red).
